# Supplementary material for: Pre-Disposition and Epigenetics Govern Variation in Bacterial Survival upon Stress
Source: PubMed Central journal article supplement (PMC3527273; doi:10.1371/journal.pgen.1003148), 2012-12-20

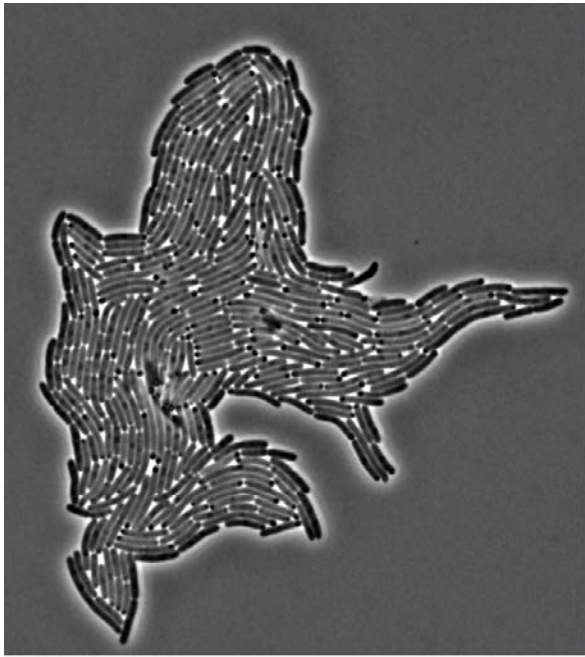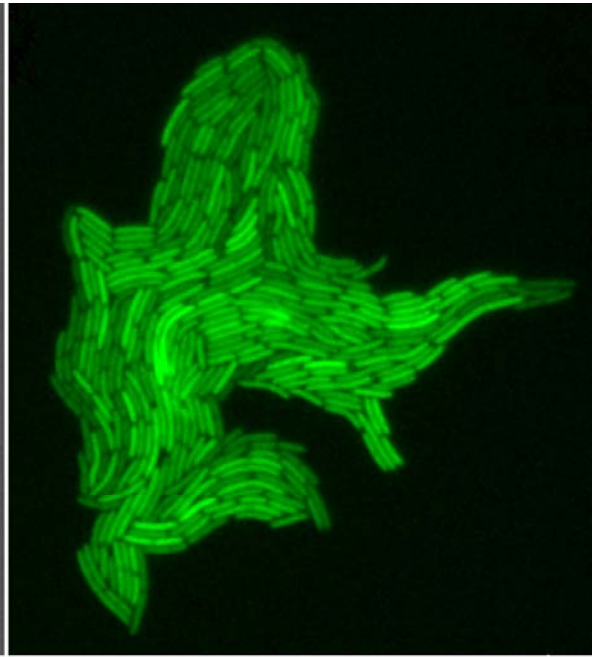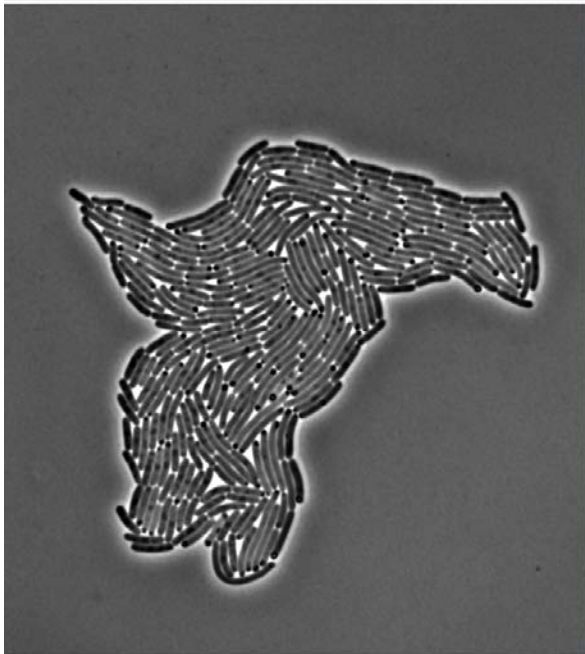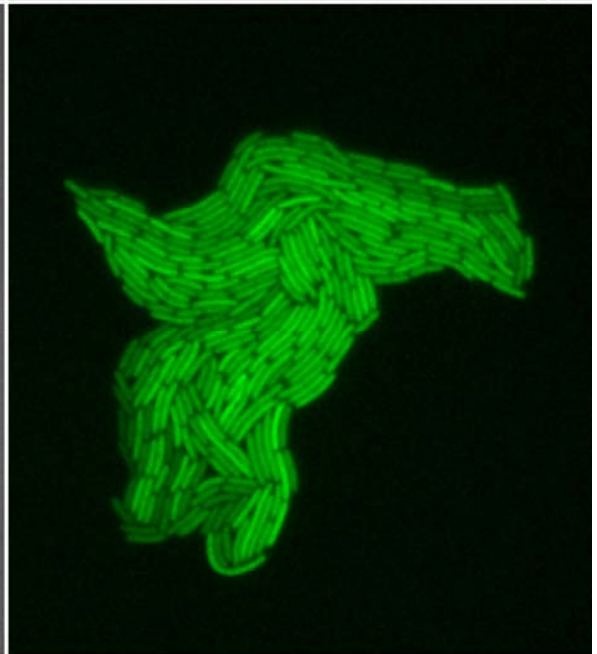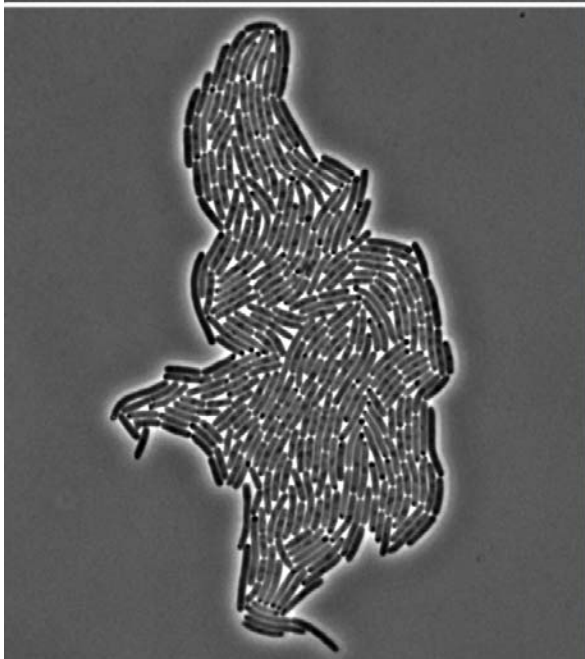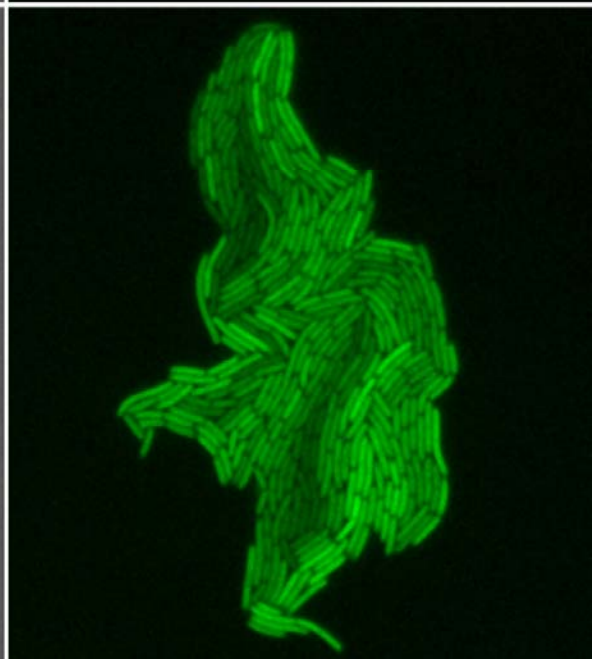

Supplement: pgen.1003148.s003.pdf [file pgen.1003148.s003.pdf]
